# Supplementary material
Source: publisher figshare collection journal article supplement (https://acs.figshare.com/ndownloader/files/5840163)
Supplement: Supplementary file 1 [file 5840163]

## Supporting Information Available

### Click Linker: Efficient and High Yielding Synthesis of a New Family of SPOS Resins by 1,3-Dipolar Cycloaddition

Stefan Löber, Pilar Rodriguez-Loaiza and Peter Gmeiner\*

Department of Medicinal Chemistry, Emil Fischer Center, Friedrich-Alexander University,  
Schuhstraße 19, D-91052 Erlangen (Germany)

#### Experimental details:

##### *Preparation of the FAMT and FIMT resins 3a-f:*

Merrifield resin (5.0 g, 1.1-1.7mmol/g) was reacted in a parallel synthesizer (Advanced ChemTech PLS) with NaN<sub>3</sub> (5eq) in DMSO (50mL) at 60 °C for 48 h. After being cooled to rt, the suspension was filtrated and the resin was washed alternatingly with MeOH (5x30mL) and CH<sub>2</sub>Cl<sub>2</sub> (5x30mL) to give azidomethyl polystyrene **4** (FT-IR: 2096cm<sup>-1</sup>). Addition of **1a-e** or **6** (5eq), CuI (0.02eq), THF (35mL) and DIPEA (15mL) was followed by agitation at 35 °C. Reaction was stopped when the IR-signal of the azido group had completely disappeared. The resin was collected by filtration and washed alternatingly with pyridine (5x30mL), MeOH (5x30mL) and CH<sub>2</sub>Cl<sub>2</sub> (5x30mL). Drying of the residue in vacuum gave **3a-f** showing an IR signal for the aldehyde C=O at 1650-1690 cm<sup>-1</sup>.

##### *Parallel synthesis of the arylcarbamides 10a-t:*

Five teflon reactors (AdvancedChemtech PLS) were charged each with the resin **3f** (200mg), one of the amines **A1-A5** (5eq), Na(OAc)<sub>3</sub>BH (5eq) and CH<sub>2</sub>Cl<sub>2</sub> (5mL). Agitation for 16 h at rt was followed by filtration and alternating washing of the resin with MeOH (5x5mL), MeOH/H<sub>2</sub>O 1:1 (5x5mL), MeOH (5x5mL) and CH<sub>2</sub>Cl<sub>2</sub> (5x5mL). Each resin was quartered, transferred into four teflon vessels and treated with DMF (2mL). Addition of a mixture of one of the carboxylic acids **B1-B4** (5eq) and TFFH (5eq), being preincubated in DMF/DIPEA (4:1) for 1h at rt, was followed by agitation for 24 h. IR analyses indicated the appearance of an amide signal at 1620-1630cm<sup>-1</sup>. Filtration and washing of the resins with MeOH (5x5mL) and CH<sub>2</sub>Cl<sub>2</sub> (5x5mL) and subsequent agitation with TFA (2% in CH<sub>2</sub>Cl<sub>2</sub>, 3mL) was followed by filtration. Evaporation gave the crude carboxamides **10a-f**. HPLC analysis (CH<sub>3</sub>CN/0.1N CH<sub>3</sub>COOH; UV detection at 240nm) was conducted after extraction with Et<sub>2</sub>O/aq. NaHCO<sub>3</sub>.

Dopamine receptor affinity of the test compounds **10a-t** displayed as the percental displacement of [<sup>3</sup>H]-spiperone from the human D2<sub>long</sub>, D2<sub>short</sub>, D3 and D4.4 receptor subtypes.

| Cpd.       | Concentration (test compound)[mol/l] | Displacement of [ <sup>3</sup> H]-spiperone |                      |     |       |
|------------|--------------------------------------|---------------------------------------------|----------------------|-----|-------|
|            |                                      | hD2 <sub>long</sub>                         | hD2 <sub>short</sub> | hD3 | hD4.4 |
| <b>11a</b> | 10 <sup>-7</sup>                     | <5                                          | <5                   | <5  | <5    |
|            | 10 <sup>-5</sup>                     | 36                                          | 31                   | 48  | 58    |
| <b>11b</b> | 10 <sup>-7</sup>                     | <5                                          | <5                   | 7   | 11    |
|            | 10 <sup>-5</sup>                     | 20                                          | 19                   | 16  | 23    |
| <b>11c</b> | 10 <sup>-7</sup>                     | <5                                          | <5                   | <5  | 15    |
|            | 10 <sup>-5</sup>                     | 9                                           | 15                   | 21  | 24    |
| <b>11d</b> | 10 <sup>-7</sup>                     | <5                                          | <5                   | <5  | <5    |
|            | 10 <sup>-5</sup>                     | <5                                          | <5                   | 10  | 24    |
| <b>11e</b> | 10 <sup>-7</sup>                     | <5                                          | <5                   | <5  | <5    |
|            | 10 <sup>-5</sup>                     | 18                                          | 6                    | 7   | 34    |
| <b>11f</b> | 10 <sup>-7</sup>                     | <5                                          | 5                    | 8   | 60    |
|            | 10 <sup>-5</sup>                     | 28                                          | 26                   | 32  | 96    |
| <b>11g</b> | 10 <sup>-7</sup>                     | <5                                          | <5                   | <5  | 21    |
|            | 10 <sup>-5</sup>                     | 19                                          | 16                   | 13  | 97    |
| <b>11h</b> | 10 <sup>-7</sup>                     | <5                                          | <5                   | <5  | <5    |
|            | 10 <sup>-5</sup>                     | <5                                          | <5                   | <5  | 8     |
| <b>11i</b> | 10 <sup>-7</sup>                     | <5                                          | <5                   | <5  | 77    |
|            | 10 <sup>-5</sup>                     | 23                                          | 16                   | 27  | 94    |
| <b>11j</b> | 10 <sup>-7</sup>                     | 19                                          | <5                   | 9   | 65    |
|            | 10 <sup>-5</sup>                     | 26                                          | 29                   | 40  | >99   |
| <b>11k</b> | 10 <sup>-7</sup>                     | <5                                          | <5                   | 10  | 9     |
|            | 10 <sup>-5</sup>                     | 27                                          | 24                   | 73  | 78    |
| <b>11l</b> | 10 <sup>-7</sup>                     | <5                                          | <5                   | <5  | <5    |
|            | 10 <sup>-5</sup>                     | <5                                          | 11                   | 11  | 34    |
| <b>11m</b> | 10 <sup>-7</sup>                     | <5                                          | 5                    | 10  | <5    |
|            | 10 <sup>-5</sup>                     | 33                                          | 45                   | 73  | 57    |
| <b>11n</b> | 10 <sup>-7</sup>                     | <5                                          | <5                   | <5  | 36    |
|            | 10 <sup>-5</sup>                     | 70                                          | 58                   | 45  | >99   |
| <b>11o</b> | 10 <sup>-7</sup>                     | <5                                          | <5                   | <5  | 10    |

|            |           |    |    |    |     |
|------------|-----------|----|----|----|-----|
|            | $10^{-5}$ | 13 | 12 | 18 | 24  |
| <b>11p</b> | $10^{-7}$ | <5 | <5 | 8  | 19  |
|            | $10^{-5}$ | 42 | 47 | 40 | 95  |
| <b>11q</b> | $10^{-7}$ | <5 | <5 | <5 | <5  |
|            | $10^{-5}$ | 31 | 24 | 17 | 55  |
| <b>11r</b> | $10^{-7}$ | <5 | <5 | <5 | <5  |
|            | $10^{-5}$ | 7  | 8  | 11 | 19  |
| <b>11s</b> | $10^{-7}$ | 18 | 6  | <5 | 70  |
|            | $10^{-5}$ | 66 | 67 | 40 | >99 |
| <b>11t</b> | $10^{-7}$ | <5 | 5  | 10 | <5  |
|            | $10^{-5}$ | 17 | 18 | 25 | 57  |

The authors thank Dr. J.-C. Schwartz and Dr. P. Sokoloff (INSERM, Paris), Dr. H. H. M. Van Tol (Clarke Institute of Psychiatry, Toronto) as well as Dr. J. Shine (The Garvan Institute of Medical Research, Sydney) for providing dopamine D3, D4 and D2 receptor expressing cell lines, respectively.
